# Supplementary material
Source: PubMed Central journal article supplement (PMC3435110)
Supplement: NIHMS340277-supplement-1.pdf [file NIHMS340277-supplement-1.pdf]

# **Uncoupling the roles of synaptotagmin I as a dual Ca<sup>2+</sup> sensor during endo- and exocytosis of synaptic vesicles**

\*Jun Yao, \*Sung E. Kwon, Jon D. Gaffaney, F. Mark Dunning, and Edwin R. Chapman

Howard Hughes Medical Institute and Department of Neuroscience, University of Wisconsin, Madison, Wisconsin 53706

\*These authors contributed equally to the work done in this study.

***SUPPLEMENTARY FIGURES 1-9***

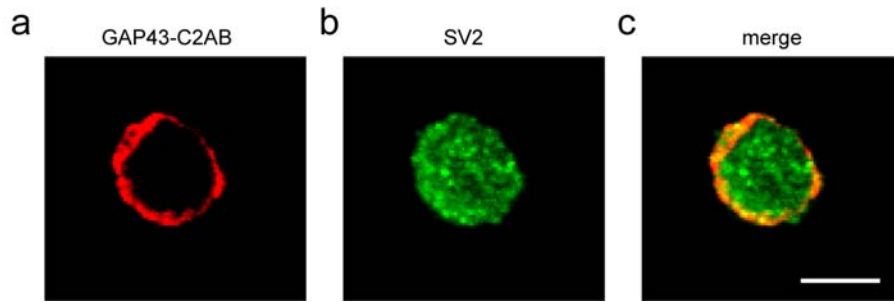

**Supplementary Figure 1. GAP43-C2AB is localized to the plasma membrane of chromaffin cells.** (a) Immunostaining with an antibody specific for the C2A domain of syt1 was used to visualize GAP43-C2AB. (B) Immunostaining with an anti-SV2A antibody was used to demarcate secretory vesicles. (C) Overlaid image; GAP43-C2AB exhibited a distinct ring-like localization pattern, consistent with targeting to the plasma membrane. Scale bar, 8  $\mu\text{m}$ .

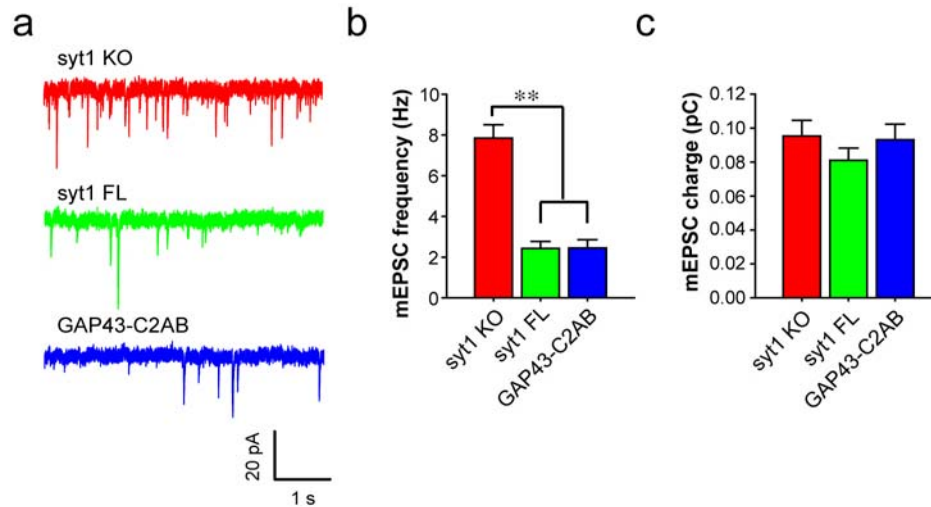

**Supplementary Figure 2. GAP43-C2AB rescues the changes in mEPSC frequency that occur in syt1 KO neurons.** (a) Representative traces of mEPSCs recorded from syt1 KO neurons and KO neurons with lentiviral expression of syt1<sup>FL</sup> or GAP43-C2AB. (b) Bar graph showing that neurons expressing syt1<sup>FL</sup> (n = 13) and GAP43-C2AB (n = 19) exhibited similar mEPSC frequencies, which were significantly lower than for syt1 KO neurons (n = 20). (c) Bar graph summarizing the charge transfer during mEPSCs. \*\* p<0.001. Error bars represent SEM.

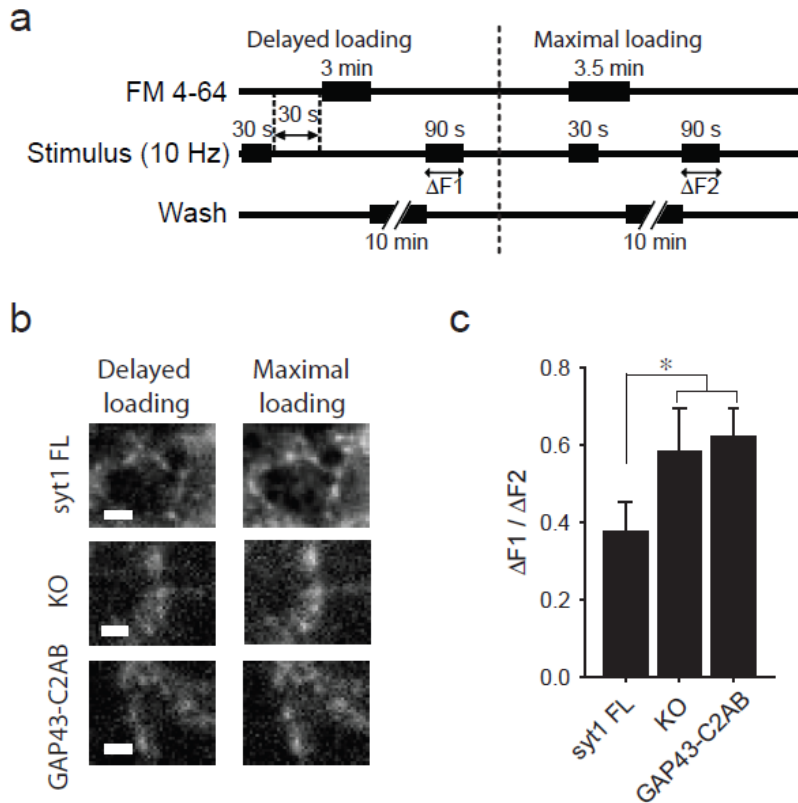

**Supplementary Figure 3. GAP43-C2AB does not rescue defective SV endocytosis in syt1 KO hippocampal neurons.** (a) Protocol for FM 4-64 pulse-chase experiments. Neurons were stimulated at 10 Hz for 30 s. After a short delay (30 s), neurons were exposed to FM 4-64 for 3 min and then washed in  $Ca^{2+}$  free solution for 10 min. A train of 900 pulses (10 Hz) was delivered to evoke unloading of FM 4-64. After a 10 min rest, neurons were stimulated at 10 Hz for 30 s in the presence of FM 4-64. This was followed by washing and unloading in the same manner as the first round. (b) Sample images showing boutons labeled with FM 4-64 during the delayed loading (left panels) and the maximally loaded boutons (right panels). Scale bar, 2  $\mu$ m. (c) Average  $\Delta F1/\Delta F2$  ratio of syt1 KO neurons ( $n = 35$ ), and neurons expressing syt1<sup>FL</sup> ( $n = 40$ ) or GAP43-C2AB ( $n = 30$ ). GAP43-C2AB expressing neurons, similar to syt1 KO neurons, exhibited a larger extent of FM dye uptake during a delayed loading phase, demonstrating slower rates of endocytosis as compared to neurons expressing syt1<sup>FL</sup>. 'n' is total number of boutons pooled from 3 coverslips. \*  $p < 0.05$ . Error bars represent SEM.

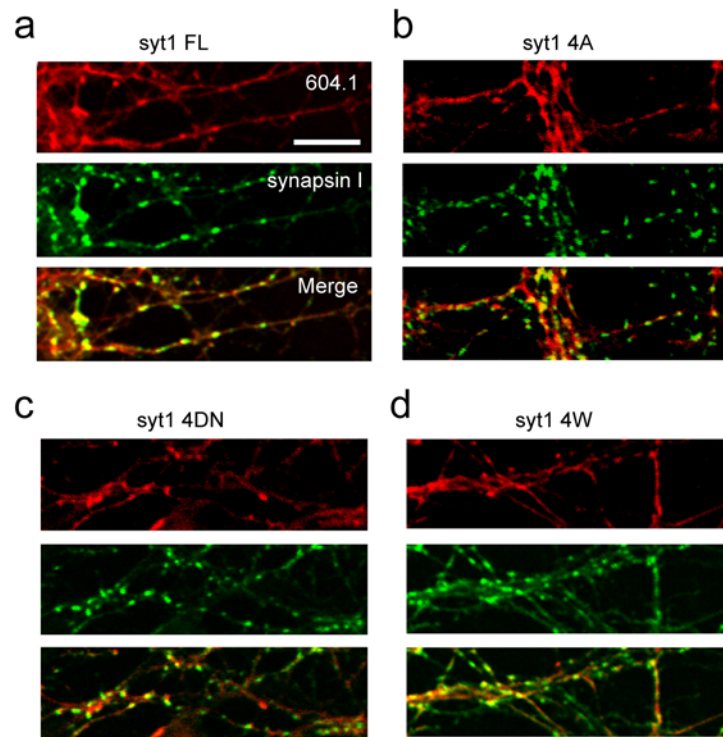

**Supplementary Figure 4. Syt1<sup>4A</sup>, syt1<sup>4W</sup>, and syt1<sup>4DN</sup>, are targeted to presynaptic boutons.** (a-d) Typical immunostaining images of syt1 KO neurons expressing syt1<sup>FL</sup> (a), syt1<sup>4A</sup> (b), syt1<sup>4DN</sup> (c), or syt1<sup>4W</sup> (d), using an antibody specific for the luminal domain of syt 1 (604.1). Presynaptic boutons were labeled using an antibody against synapsin I. Scale bar, 5  $\mu$ m.

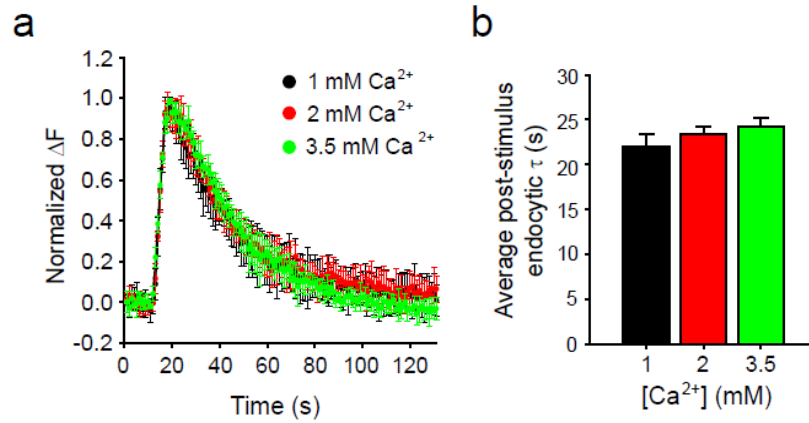

**Supplementary Figure 5. Varying the extracellular  $[\text{Ca}^{2+}]$  from 1-3.5 mM does not affect the kinetics of SV endocytosis.** (a) Normalized fluorescence changes of sypHy in WT neurons in the presence of 1 mM ( $n = 11$ ), 2 mM ( $n = 10$ ), or 3.5 mM ( $n = 8$ ) extracellular  $\text{Ca}^{2+}$ . 'n' is number of boutons from 1 coverslip. (b) Bar graph comparing the time constants for endocytosis at different extracellular  $[\text{Ca}^{2+}]$ . Error bars represent SD.

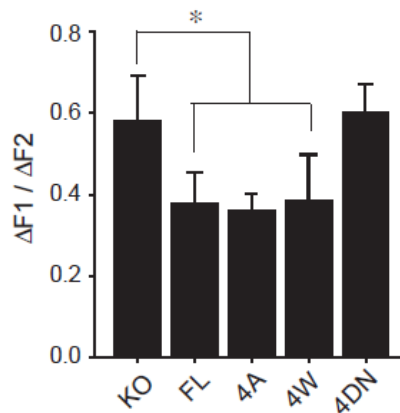

**Supplementary Figure 6. FM imaging reveals that syt1 accelerates SV endocytosis via its  $\text{Ca}^{2+}$  binding activity.** Average  $\Delta F1/\Delta F2$  ratio (see Supplementary Fig. 3) of syt1 KO neurons (n = 35), KO neurons expressing syt1<sup>FL</sup> (n = 40), syt1<sup>4A</sup> (n = 34), syt1<sup>4W</sup> (n = 30), or syt1<sup>4DN</sup> (n = 30). Syt1<sup>4A</sup>, syt1<sup>4W</sup> and syt1<sup>FL</sup> have the same degree of delayed dye loading estimated by  $\Delta F1/\Delta F2$  ratio; in contrast, delayed loading was significantly enhanced in syt1<sup>4DN</sup> expressing neurons, thus confirming slower rate of endocytosis for this mutant. 'n' is total number of boutons pooled from 3 coverslips. The protocol for the FM 4-64 pulse-chase experiments to determine  $\Delta F1/\Delta F2$ , is described in Supplementary Fig. 3. \* p < 0.05. Error bars represent SEM.

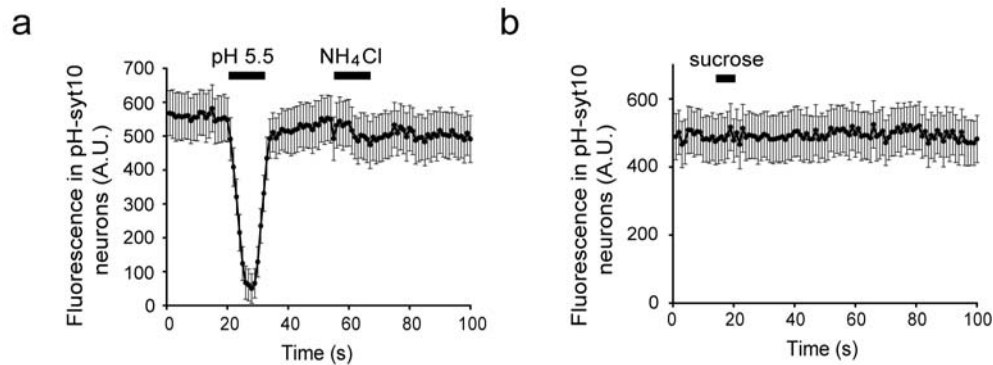

**Supplementary Figure 7. Sucrose does not affect the fluorescence intensity of plasma membrane localized pH-syt10.** To test whether the sucrose-induced changes in sypHy fluorescence intensity were secondary to mechanical effects, we investigated the influence of sucrose on a plasma membrane reporter, pHluorin tagged synaptotagmin X (pH-syt10). (a) We monitored the changes of pH-syt10 fluorescence intensity in response to application of low pH solution (pH 5.5) or NH<sub>4</sub>Cl. If pH-syt10 was localized to the plasma membrane, low pH buffer would quench the fluorescence of pH-syt10; whereas in the case of SV localization, NH<sub>4</sub>Cl application would neutralize the acidic luminal pH of SVs (or other acidic organelles) and subsequently dequench the fluorescence of pH-syt10. Strikingly, we found that the fluorescence intensity of pH-syt10 was markedly reduced by the low pH solution but was unaffected by NH<sub>4</sub>Cl application, suggesting that pH-syt10 is localized to the plasma membrane in hippocampal neurons and not to SVs. (b) We measured fluorescence intensity of pH-syt10 in response to 0.5 M sucrose superfusion, and found that sucrose did not induce any obvious fluorescence change (n = 20 boutons, 1 coverslip). Hence, the sucrose-induced changes in sypHy fluorescence intensity reflect changes in SV retrieval but are not secondary to mechanical effects.

Note: the pH-syt10 construct is analogous to the well-characterized pH-syt1 construct<sup>49</sup> and will be described in detail elsewhere.



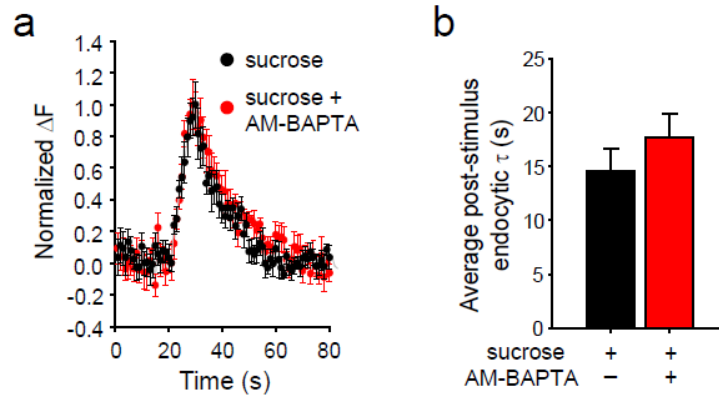

**Supplementary Figure 8. Sucrose-induced endocytosis is  $\text{Ca}^{2+}$  independent.** (a) Normalized fluorescence changes of syHy in syt1 KO neurons in response to superfusion of 0.5 M sucrose ( $n = 12$ ) in the presence of  $\text{Ca}^{2+}$ , or under  $\text{Ca}^{2+}$  free conditions (0 mM  $\text{Ca}^{2+}$  plus preincubation with 30  $\mu\text{M}$  AM-BAPTA) ( $n = 8$  boutons, 1 coverslip). (b) Bar graph comparing the endocytic time constants for vesicle retrieval, after hypertonic sucrose-induced exocytosis, under  $\text{Ca}^{2+}$  and  $\text{Ca}^{2+}$  free conditions. Error bars represent SD.

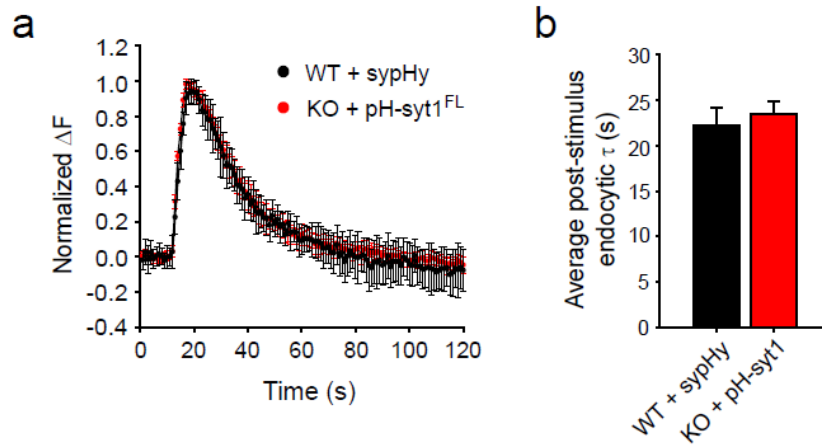

**Supplementary Figure 9. pHluorin tagged syt1 and synaptophysin report identical rates of SV endocytosis when expressed in hippocampal neurons.** (a) Normalized pHluorin responses showing that the kinetics of endocytosis were similar between syt1 KO neurons ( $n = 32$ ) rescued by pH-syt1<sup>FL</sup> and WT neurons expressing sypHy ( $n = 25$ ). 'n' is total number of boutons pooled from 2 coverslips. (b) Bar graph showing similar endocytic time constants between WT neurons expressing sypHy and syt1 KO neurons expressing pH-syt1<sup>FL</sup>. Error bars represent SEM.
